# Supplementary material
Source: HighWire-hosted journal article supplement (https://jnm.snmjournals.org/highwire/filestream/95056/field_highwire_adjunct_files/0/176891_Supplemental_Data.pdf)
Supplement: 176891_Supplemental_Data.pdf [file 176891_Supplemental_Data.pdf]

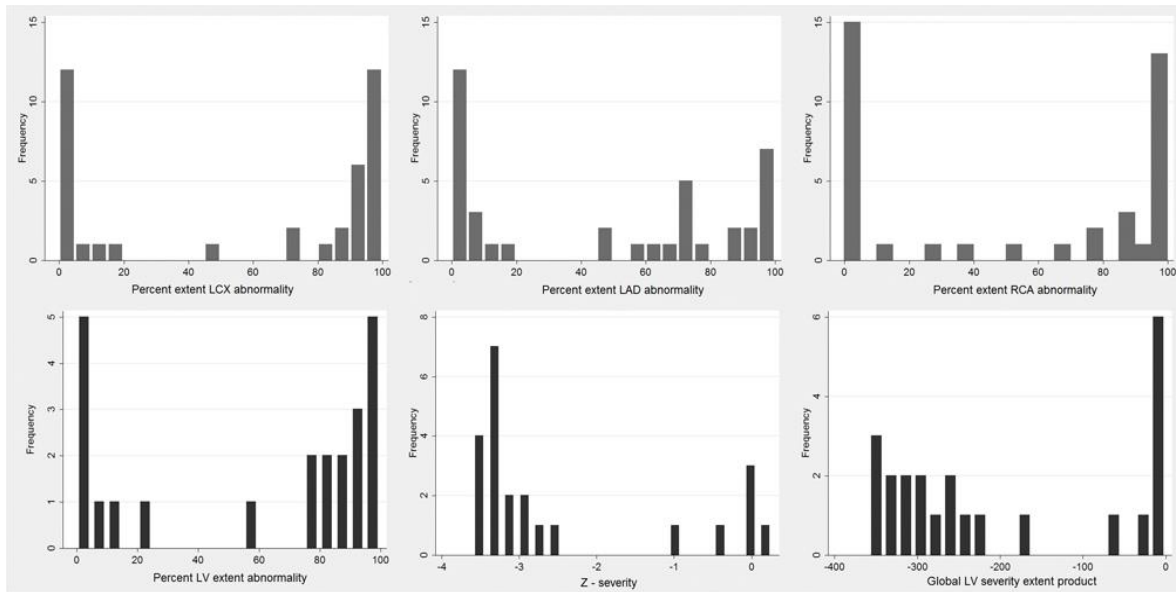

Supplemental Figure 1.

(A) Bar chart demonstrating the frequency distribution of cardiac sympathetic denervation in 39 patients with IPD on  $^{11}\text{C}$ -HED PET scans with respect to Percent % LV Extent Abnormality in the (left) Left Circumflex (middle) Left Anterior Descending and (right) Right coronary artery, territories. There is a binomial distribution with patients either having severe cardiac sympathetic denervation or normal or relatively mild denervation. This pattern is most pronounced in the Left Circumflex territory. (B) Bar chart demonstrating the frequency distribution of 23 patients with IPD at baseline  $^{11}\text{C}$ -HED PET imaging, with respect to global LV parameters; (left) Percent % LV Extent, (middle) z-score severity and (right) Severity Extent Product (SEP). There is a binomial distribution of these parameters with the SEP divided into normal (n=5), mild (n=3) and severe (n=15) categories on baseline  $^{11}\text{C}$ -HED PET.

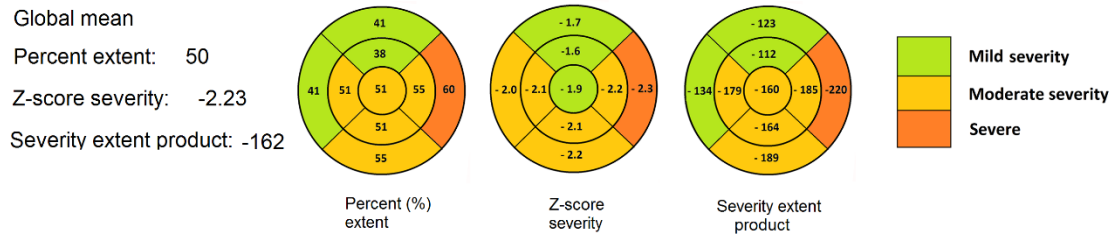

Supplemental Figure 2.

Bullseye plots using a 9-segment model summarizing the segmental distribution of sympathetic denervation with respect to mean percentage extent, z-score severity and severity extent product (SEP), in comparison to the global mean measurements. As we have previously described in 27 patients, the lateral wall displays greater extent involvement and more severe reduction of <sup>11</sup>C-HED retention in comparison to the anterior and proximal septal walls, confirmed in this cohort of 39 pts.

SUPPLEMENTAL TABLE 1

Demographics and cardiac <sup>11</sup>C-HED retention measurements ranked by percentage extent.

| Patient No. | Gender | Age (y) | Duration (y) | <sup>11</sup> C]HED Retention Index |   |       | Percentage Extent | LCX  | LAD | RCA  | Z-Score Severity Global |   |        |
|-------------|--------|---------|--------------|-------------------------------------|---|-------|-------------------|------|-----|------|-------------------------|---|--------|
|             |        |         |              |                                     |   |       |                   |      |     |      |                         |   | Global |
| 1           | m      | 63      | 4.0          | 0.069                               | ± | 0.013 | 0.0%              | 0%   | 0%  | 0%   | -0.97                   | ± | 0.70   |
| 2           | m      | 72      | 3.0          | 0.085                               | ± | 0.009 | 0.0%              | 0%   | 0%  | 0%   | -0.01                   | ± | 0.52   |
| 3           | m      | 73      | 5.0          | 0.064                               | ± | 0.014 | 0.0%              | 0%   | 0%  | 0%   | 0.00                    | ± | 0.00   |
| 4           | m      | 64      | 3.0          | 0.071                               | ± | 0.009 | 0.0%              | 0%   | 0%  | 0%   | 0.00                    | ± | 0.00   |
| 5           | f      | 65      | 8.0          | 0.089                               | ± | 0.011 | 0.0%              | 0%   | 0%  | 0%   | 0.00                    | ± | 0.00   |
| 6           | m      | 63      | 14.0         | 0.065                               | ± | 0.009 | 0.0%              | 0%   | 0%  | 0%   | 0.00                    | ± | 0.00   |
| 7           | m      | 62      | 4.0          | 0.070                               | ± | 0.009 | 0.0%              | 0%   | 0%  | 0%   | 0.00                    | ± | 0.00   |
| 8           | m      | 64      | 1.5          | 0.086                               | ± | 0.014 | 0.0%              | 0%   | 0%  | 0%   | 0.03                    | ± | 0.60   |
| 9           | f      | 54      | 2.0          | 0.090                               | ± | 0.022 | 0.0%              | 0%   | 0%  | 0%   | 0.28                    | ± | 1.23   |
| 10          | m      | 66      | 4.0          | 0.091                               | ± | 0.007 | 0.0%              | 0%   | 0%  | 0%   | 0.36                    | ± | 0.51   |
| 11          | m      | 52      | 2.0          | 0.093                               | ± | 0.012 | 0.0%              | 0%   | 0%  | 0%   | 0.49                    | ± | 0.65   |
| 12          | m      | 66      | 5.0          | 0.059                               | ± | 0.007 | 4.6%              | 11%  | 3%  | 3%   | -1.62                   | ± | 0.53   |
| 13          | m      | 62      | 1.0          | 0.057                               | ± | 0.010 | 7.7%              | 19%  | 5%  | 1%   | -2.73                   | ± | 0.20   |
| 14          | m      | 63      | 8.0          | 0.064                               | ± | 0.017 | 8.3%              | 7%   | 11% | 0%   | -2.63                   | ± | 0.08   |
| 15          | f      | 72      | 3.0          | 0.080                               | ± | 0.021 | 12.1%             | 0%   | 19% | 0%   | -0.39                   | ± | 1.02   |
| 16          | m      | 55      | 3.0          | 0.054                               | ± | 0.007 | 15.4%             | 45%  | 5%  | 14%  | -2.73                   | ± | 0.19   |
| 17          | m      | 60      | 2.0          | 0.055                               | ± | 0.010 | 23.1%             | 73%  | 5%  | 25%  | -2.74                   | ± | 0.20   |
| 18          | m      | 57      | 8.0          | 0.044                               | ± | 0.010 | 57.9%             | 90%  | 48% | 51%  | -2.97                   | ± | 0.29   |
| 19          | m      | 61      | 5.0          | 0.043                               | ± | 0.005 | 59.8%             | 81%  | 45% | 89%  | -2.91                   | ± | 0.27   |
| 20          | m      | 57      | 2.0          | 0.042                               | ± | 0.009 | 66.7%             | 94%  | 65% | 35%  | -2.71                   | ± | 0.53   |
| 21          | m      | 70      | 6.0          | 0.041                               | ± | 0.008 | 67.5%             | 93%  | 56% | 79%  | -3.08                   | ± | 0.39   |
| 22          | f      | 53      | 4.5          | 0.039                               | ± | 0.007 | 70.2%             | 74%  | 62% | 100% | -3.19                   | ± | 0.50   |
| 23          | f      | 59      | 2.0          | 0.038                               | ± | 0.007 | 75.4%             | 86%  | 71% | 79%  | -3.18                   | ± | 0.43   |
| 24          | m      | 65      | 3.0          | 0.040                               | ± | 0.008 | 76.0%             | 94%  | 72% | 67%  | -3.00                   | ± | 0.37   |
| 25          | m      | 52      | 7.0          | 0.037                               | ± | 0.012 | 80.8%             | 98%  | 74% | 85%  | -3.26                   | ± | 0.41   |
| 26          | m      | 50      | 5.0          | 0.037                               | ± | 0.007 | 82.1%             | 100% | 71% | 100% | -3.18                   | ± | 0.45   |
| 27          | m      | 62      | 3.0          | 0.035                               | ± | 0.009 | 82.9%             | 100% | 73% | 99%  | -3.14                   | ± | 0.66   |

|    |   |    |      |       |   |       |        |      |      |      |       |   |      |
|----|---|----|------|-------|---|-------|--------|------|------|------|-------|---|------|
| 28 | m | 61 | 1.0  | 0.035 | ± | 0.005 | 87.1%  | 100% | 79%  | 100% | -3.26 | ± | 0.51 |
| 29 | m | 69 | 3.0  | 0.034 | ± | 0.006 | 89.2%  | 94%  | 86%  | 96%  | -3.26 | ± | 0.44 |
| 30 | f | 64 | 3.0  | 0.034 | ± | 0.006 | 91.5%  | 100% | 86%  | 100% | -3.23 | ± | 0.49 |
| 31 | m | 60 | 10.0 | 0.033 | ± | 0.007 | 92.9%  | 100% | 92%  | 88%  | -3.30 | ± | 0.40 |
| 32 | f | 62 | 7.0  | 0.033 | ± | 0.008 | 93.8%  | 85%  | 97%  | 93%  | -3.33 | ± | 0.44 |
| 33 | f | 71 | 3.0  | 0.029 | ± | 0.008 | 95.0%  | 100% | 92%  | 100% | -3.55 | ± | 0.49 |
| 34 | m | 61 | 3.0  | 0.031 | ± | 0.006 | 96.9%  | 100% | 95%  | 99%  | -3.38 | ± | 0.50 |
| 35 | f | 56 | 13.0 | 0.032 | ± | 0.005 | 97.3%  | 94%  | 98%  | 100% | -3.32 | ± | 0.37 |
| 36 | m | 69 | 8.0  | 0.027 | ± | 0.006 | 97.5%  | 100% | 96%  | 99%  | -3.63 | ± | 0.54 |
| 37 | m | 61 | 1.0  | 0.028 | ± | 0.006 | 97.9%  | 100% | 97%  | 100% | -3.58 | ± | 0.45 |
| 38 | m | 63 | 8.0  | 0.027 | ± | 0.005 | 99.2%  | 100% | 99%  | 100% | -3.61 | ± | 0.49 |
| 39 | m | 55 | 7.0  | 0.028 | ± | 0.005 | 100.0% | 100% | 100% | 100% | -3.57 | ± | 0.43 |

LAD = left anterior descending artery, LCX = left circumflex artery, RCA = right coronary artery
